# Supplementary material
Source: PubMed Central journal article supplement (PMC8838880)
Supplement: NIHMS1776249-supplement-Appendix_A.pdf [file NIHMS1776249-supplement-Appendix_A.pdf]

## Supplementary Data

We compared our scDCT measurement results in homogenous tissue phantoms at exposure times of 1, 2, and 5 ms (see **Supplementary Fig. 1**). Means  $\pm$  standard deviations of relative flow values were  $99 \pm 13\%$ ,  $95 \pm 26\%$ ,  $102 \pm 30\%$  in 5ms, 2 ms, 1 ms, respectively, in 2-8 mm. Data obtained with the exposure time of 5 ms (blue curve) generate the most stable/constant relative flow values at effective S-D separations of 2 to 8 mm.

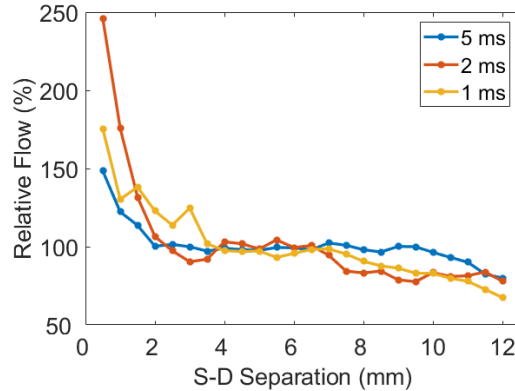

**Supplementary Figure 1:** Boundary flow distributions over the selected source ( $S_2$ ) and left detector array with S-D separations ranging from 0.5-12 mm in a homogenous tissue phantom (see the S-D configuration in **Fig. 3**). Flow indices were normalized to their mean value to generate relative flow values for presentation.

To test the dependence of effective S-D separations on phantom optical properties, we used the scDCT to measure Intralipid particle flow changes due to varied temperatures ( $25^\circ\text{C}$ ,  $40^\circ\text{C}$ , and  $55^\circ\text{C}$ ; **Supplementary Fig. 2a**) and varied tissue absorption coefficient  $\mu_a$  by adding Indian ink ( $0.03$ ,  $0.07$ , and  $0.10 \text{ cm}^{-1}$ ; **Supplementary Fig. 2b**). The means  $\pm$  standard deviations of relative flow were  $111 \pm 10\%$ ,  $102 \pm 11\%$ ,  $101 \pm 15\%$  respectively with varied temperatures and  $103 \pm 12\%$ ,  $108 \pm 14\%$ ,  $105 \pm 16\%$  respectively with varied  $\mu_a$ . Results verify that data obtained at effective S-D separations of 2 to 8 mm are relatively constant and stable.

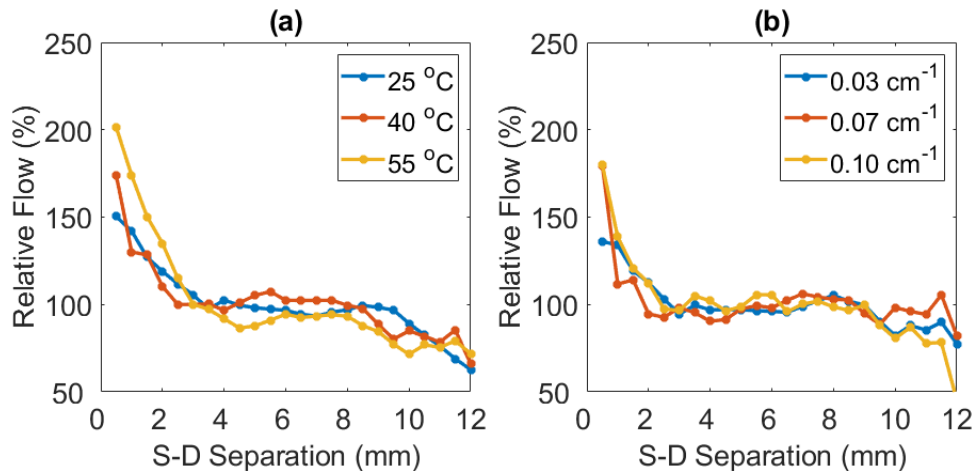

**Supplementary Figure 2:** Boundary flow distributions over the selected source ( $S_2$ ) and left detector array with S-D separations of 0.5-12 mm on homogenous tissue phantoms (see the S-D configuration in **Fig. 3**). **(a)** Intralipid particle flow variations with varied temperatures of  $25^\circ\text{C}$ ,  $40^\circ\text{C}$ , and  $55^\circ\text{C}$ . **(b)** Intralipid particle flow variations with varied  $\mu_a$  of  $0.03$ ,  $0.07$ , and  $0.10 \text{ cm}^{-1}$ .
